# Supplementary material for: AAV-Tau Mediates Pyramidal Neurodegeneration by Cell-Cycle Re-Entry without Neurofibrillary Tangle Formation in Wild-Type Mice
Source: PubMed Central journal article supplement (PMC2748684; doi:10.1371/journal.pone.0007280), 2009-10-01
Supplement: pone.0007280.s010.pdf [file pone.0007280.s010.pdf]

**Table S2. Markers tested by IHC on AAV-Tau.P301L mice**

| Marker protein                 | Function / action                     | Changes in AAV-Tau.P301L |      |
|--------------------------------|---------------------------------------|--------------------------|------|
|                                |                                       | Neurons                  | Glia |
| <b>Cell cycle</b>              |                                       |                          |      |
| Cyclin B1                      | G2 phase progression                  | ↑                        |      |
| Cyclin D2                      | G1 phase progression                  | ↑                        |      |
| Cyclin D3                      | G1 phase progression                  |                          | ↑    |
| Cyclin A                       | S phase progression                   |                          | ↑    |
| p27KIP1                        | Cdk inhibitor                         | ↓                        |      |
| Cdk2                           | G1-S transition                       | -                        |      |
| p57KIP2                        | Cdk inhibitor                         | ↓                        | ↑    |
| phospho-Rb                     | E2F1 inhibitor                        | ↑                        |      |
| Ki67                           | G1, S, G2, M phase                    | -                        |      |
| PCNA                           | DNA Pol processivity factor           | ↑                        |      |
| PIN1                           | Peptidyl-prolyl isomerase             |                          | ↑    |
| <b>Inflammation</b>            |                                       |                          |      |
| GFAP                           | Activated of astroglia                |                          | ↑    |
| MHCII                          | Major histocompatibility complex      |                          | ↑    |
| <b>Apoptosis</b>               |                                       |                          |      |
| Caspase-3 cleaved              | Cysteine-aspartic acid protease       | ↑                        |      |
| <b>Autophagy</b>               |                                       |                          |      |
| Beclin                         | Autophagosome formation               | ↓                        |      |
| LC3                            | Autophagosome formation               | ↓                        |      |
| <b>Cytoskeleton</b>            |                                       |                          |      |
| Actin                          | Cytoarchitecture                      | ↓                        |      |
| Tubulin                        | Microtubules constituent              | ↓                        |      |
| Synaptophysin                  | Synaptic vesicle protein              | ↓                        |      |
| <b>Stress</b>                  |                                       |                          |      |
| nNOS                           | Neuronal Nitric Oxide Synthase        | -                        |      |
| Nitrotyrosine                  | Cell damage and inflammation          |                          | ↑    |
| <b>Protein quality control</b> |                                       |                          |      |
| GRP78                          | Unfolded protein response             |                          | ↑    |
| <b>Signalling</b>              |                                       |                          |      |
| p38 MAPK (T180/Y182)           | Mitogen-activated protein kinase      | ↑                        |      |
| p44/42 MAPK (Erk1/2) T202/Y204 | Extracellular signal-regulated kinase |                          | ↑    |
| pSAPK/JNK (T183/Y185)          | Stress-activated protein kinase       | -                        |      |
| P-Akt Ser473                   | Ser/Thr kinase                        | ↓                        |      |
| P-Akt Thr308                   | Ser/Thr kinase                        | ↑                        |      |
| P-GSK3a S21                    | Ser/Thr kinase                        |                          | ↑    |
| P-GSK3b S9                     | Ser/Thr kinase                        | ↑                        |      |
| P-GSK3a/b S21/9                | Ser/Thr kinase                        | -                        |      |
| Cdk5                           | Cyclin dependent kinase               | ↓                        |      |
| P-Cdk5 S159                    | Cyclin dependent kinase               | ↑                        |      |
| P-GSK3a/b Y279/216             | Ser/Thr kinase                        | -                        |      |
| P-ATM S1981                    | DNA damage checkpoint                 | -                        |      |
| <b>Others</b>                  |                                       |                          |      |
| P-H2AX S139                    | DNA Double-strand breaks              | ↑                        |      |
| Cathepsin B                    | Serine protease                       | ↓                        |      |
| Ubiquitin                      | Protein degradation                   | ↓                        |      |
| Dkk1                           | Wnt signaling inhibitor               | -                        |      |
| Doublecortin                   | Neurogenesis                          | -                        |      |
| b-catenin                      | Transcription coregulator             | ↓                        |      |
| c-fos                          | Transcription factor                  | -                        |      |
| p35                            | Cdk5 activator                        | ↓                        | ↑    |
| P-CREB                         | Transcription factor                  | ↑                        |      |

↑, increase; ↓, decrease; -, no change
